# Supplementary material for: Paralogue annotation identifies novel pathogenic variants in patients with Brugada syndrome and catecholaminergic polymorphic ventricular tachycardia
Source: PubMed Central journal article supplement (PMC3888601; doi:10.1136/jmedgenet-2013-101917), 2013-10-17
Supplement: jmedgenet-2013-101917-s1.pdf [file jmedgenet-2013-101917-s1.pdf]

*Supplementary Table 1: Parologue annotation for missense variants, identified in CPVT cohort, that have been previously or subsequently been reported to be associated with CPVT.*

| RYR2 variant |          | Region          | Cases<br>(n=155) | Exon | Paralogue | Paralogue<br>mutation | Paralogue disease                 | Consensus |
|--------------|----------|-----------------|------------------|------|-----------|-----------------------|-----------------------------------|-----------|
| CDS          | Protein  |                 |                  |      |           |                       |                                   |           |
| c.7159G>A    | p.A2387T | Central hotspot | 3                | 47   | RYR1      | A2421P                | Congenital myopathy<br>with cores | 9         |
| c.7202G>A    | p.R2401H | Central hotspot | 1                | 47   | RYR1      | R2435H                | Central core disease              | 9         |
|              |          |                 |                  |      | RYR1      | R2435L                | Central core disease              | 9         |
| c.7207G>A    | p.A2403T | Central hotspot | 1                | 47   | RYR1      | A2437V                | Malignant hyperthermia            | 9         |
| c.14011G>C   | p.G4671R | Channel hotspot | 1                | 97   | RYR1      | G4743D                | Multiminicore disease             | 9         |
| c.14311G>A   | p.V4771I | Channel hotspot | 2                | 100  | RYR1      | V4842M                | Congenital myopathy<br>with cores | 9         |

Supplementary Table 2: Parologue annotations for missense variants, identified in BrS patients, that have previously/subsequently been reported as pathogenic.

| SCN5A variant |         | Region      | Cases<br>(n=2111) | Exon | Parologue | Parologue<br>variant | Parologue disease                          | Consensus |
|---------------|---------|-------------|-------------------|------|-----------|----------------------|--------------------------------------------|-----------|
| CDS           | Protein |             |                   |      |           |                      |                                            |           |
| c.311G>A      | p.R104Q | N-terminus  | 3                 | 3    | SCN1A     | R101W                | Myoclonic epilepsy of infancy              | 7         |
|               |         |             |                   |      | SCN1A     | R101Q                | Myoclonic epilepsy of infancy              | 7         |
| c.310C>T      | p.R104W | N-terminus  | 2                 | 3    | SCN1A     | R101W                | Myoclonic epilepsy of infancy              | 7         |
|               |         |             |                   |      | SCN1A     | R101Q                | Myoclonic epilepsy of infancy              | 7         |
| c.361C>T      | p.R121W | N-terminus  | 1                 | 3    | SCN1A     | R118S                | Myoclonic epilepsy of infancy              | 9         |
| c.665G>A      | p.R222Q | TM domain 1 | 1                 | 6    | SCN4A     | R222W                | Hypokalaemic periodic paralysis            | 9         |
| c.673C>T      | p.R225W | TM domain 1 | 3                 | 6    | SCN2A     | R223Q                | Neonatal-infantile seizures                | 9         |
|               |         |             |                   |      | SCN4A     | R225W                | Non-dystrophic myotonia                    | 9         |
| c.677C>T      | p.A226V | TM domain 1 | 2                 | 6    | SCN1A     | A223E                | Dravet syndrome                            | 9         |
| c.1066G>A     | p.D356N | TM domain 1 | 8                 | 9    | SCN1A     | D366E                | Myoclonic epilepsy of infancy              | 9         |
| c.1099C>T     | p.R367C | TM domain 1 | 2                 | 9    | SCN1A     | R377Q                | Generalized epilepsy with febrile seizures | 9         |
|               |         |             |                   |      | SCN1A     | R377L                | Dravet syndrome                            | 9         |
| c.1100G>A     | p.R367H | TM domain 1 | 6                 | 9    | SCN1A     | R377Q                | Generalized epilepsy with febrile seizures | 9         |
|               |         |             |                   |      | SCN1A     | R377L                | Dravet syndrome                            | 9         |
| c.1106T>A     | p.M369K | TM domain 1 | 1                 | 9    | SCN1A     | M379R                | Dravet syndrome                            | 9         |
| c.2314G>A     | p.D772N | TM Domain 2 | 1                 | 15   | CACNA1H   | G848S                | Childhood absence epilepsy                 | 9         |
| c.2423G>C     | p.R808P | TM Domain 2 | 1                 | 15   | SCN1A     | R859C                | Generalized epilepsy with febrile seizures | 9         |
|               |         |             |                   |      | SCN4A     | R669H                | Hypokalaemic periodic paralysis            | 9         |
|               |         |             |                   |      | CACNA1S   | R528G                | Hypokalaemic periodic paralysis            | 9         |
|               |         |             |                   |      | CACNA1S   | R528H                | Hypokalaemic periodic paralysis            | 9         |
|               |         |             |                   |      | CACNA1A   | R583Q                | Hemiplegic migraine and ataxia             | 9         |

|           |          |                           |   |    |         |        |                                                    |   |
|-----------|----------|---------------------------|---|----|---------|--------|----------------------------------------------------|---|
|           |          |                           |   |    | SCN1A   | R859H  | Generalized epilepsy with febrile seizures plus    | 9 |
| c.2516T>C | p.L839P  | TM Domain 2               | 1 | 16 | SCN1A   | L890P  | Dravet syndrome C ?                                | 9 |
| c.2632C>T | p.R878C  | TM Domain 2               | 1 | 16 | SCN1A   | R931C  | Myoclonic epilepsy of infancy                      | 8 |
|           |          |                           |   |    | SCN9A   | R896Q  | Congenital indifference to pain                    | 8 |
|           |          |                           |   |    | SCN1A   | R931H  | Epilepsy ?                                         | 8 |
| c.3673G>A | p.E1225K | TM Domain 3               | 4 | 21 | SCN1A   | E1238D | Myoclonic epilepsy of infancy                      | 9 |
| c.3694C>T | p.R1232W | TM Domain 3               | 3 | 21 | SCN1A   | R1245Q | Myoclonic epilepsy of infancy                      | 7 |
| c.3784G>A | p.G1262S | TM Domain 3               | 1 | 21 | SCN1A   | G1275V | Dravet syndrome                                    | 9 |
| c.3823G>A | p.D1275N | TM Domain 3               | 3 | 21 | CACNA1F | D944Y  | Night blindness, congenital stationary, incomplete | 9 |
|           |          |                           |   |    | SCN1A   | D1288N | Dravet syndrome C ?                                | 9 |
| c.3995C>T | p.P1332L | TM Domain 3               | 1 | 23 | SCN4A   | P1158S | Hypokalaemic periodic paralysis                    | 9 |
|           |          |                           |   |    | SCN9A   | P1308L | Erythralgia, primary                               | 9 |
| c.4018G>A | p.V1340I | TM Domain 3               | 1 | 23 | SCN1A   | V1353L | Generalized epilepsy with febrile seizures plus    | 9 |
| c.4145G>T | p.S1382I | TM Domain 3               | 1 | 23 | SCN1A   | T1394I | Dravet syndrome C ?                                | 4 |
| c.4313C>T | p.P1438L | TM Domain 3               | 1 | 25 | SCN1A   | P1451L | Myoclonic epilepsy of infancy                      | 9 |
|           |          |                           |   |    | SCN1A   | P1451S | Dravet syndrome C ?                                | 9 |
| c.4501C>G | p.L1501V | Interdomain Linker III-IV | 1 | 26 | SCN1A   | L1514S | Dravet syndrome                                    | 2 |
| c.4868G>A | p.R1623Q | TM Domain 4               | 1 | 28 | SCN1A   | R1636Q | Lennox-Gastaut syndrome                            | 6 |
|           |          |                           |   |    | SCN4A   | R1448S | Paramyotonia congenita                             | 6 |
|           |          |                           |   |    | SCN4A   | R1448C | Paramyotonia congenita                             | 6 |
|           |          |                           |   |    | SCN4A   | R1448H | Paramyotonia congenita                             | 6 |
|           |          |                           |   |    | SCN4A   | R1448P | Myotonia                                           | 6 |
|           |          |                           |   |    | SCN4A   | R1448L | Paramyotonia congenita                             | 6 |
|           |          |                           |   |    | CACNA1F | R1296S | Night blindness, congenital stationary, incomplete | 6 |

|           |          |             |   |    |         |        |                                                   |   |
|-----------|----------|-------------|---|----|---------|--------|---------------------------------------------------|---|
|           |          |             |   |    | CACNA1A | R1662H | Episodic ataxia 2                                 | 6 |
| c.4978A>G | p.I1660V | TM Domain 4 | 5 | 28 | CACNA1A | V1696I | Hemiplegic migraine                               | 9 |
|           |          |             |   |    | CACNA1A | V1696F | Hemipl. migraine/alternating hemipl. of childhood | 9 |
|           |          |             |   |    | SCN1A   | I1673T | Dravet syndrome C ?                               | 9 |
| c.5218G>A | p.G1740R | TM Domain 4 | 1 | 28 | SCN1A   | G1754R | Dravet syndrome                                   | 3 |
